# Supplementary material for: Fabrication of nitrogen-doped porous carbons for highly efficient CO2 capture: rational choice of a polymer precursor
Source: Royal Society of Chemistry journal article supplement (doi:10.1039/c6ta07305k), 2016-01-01
Supplement: c6ta07305k1.pdf [file c6ta07305k1.pdf]

## Electronic Supplementary Information

### **Fabrication of nitrogen-doped porous carbons for highly efficient CO<sub>2</sub> capture: rational choice of a polymer precursor**

Jiahui Kou<sup>a,b</sup>, Lin-Bing Sun<sup>a,c,\*</sup>

*<sup>a</sup> Jiangsu National Synergetic Innovation Center for Advanced Materials (SICAM), State Key Laboratory of Materials-Oriented Chemical Engineering, Nanjing 210009, China; <sup>b</sup> College of Materials Science and Engineering, Nanjing Tech University, Nanjing 210009, China; <sup>c</sup> College of Chemistry and Chemical Engineering, Nanjing Tech University, Nanjing 210009, China.*

\*Corresponding author. E-mail: lbsun@njtech.edu.cn.

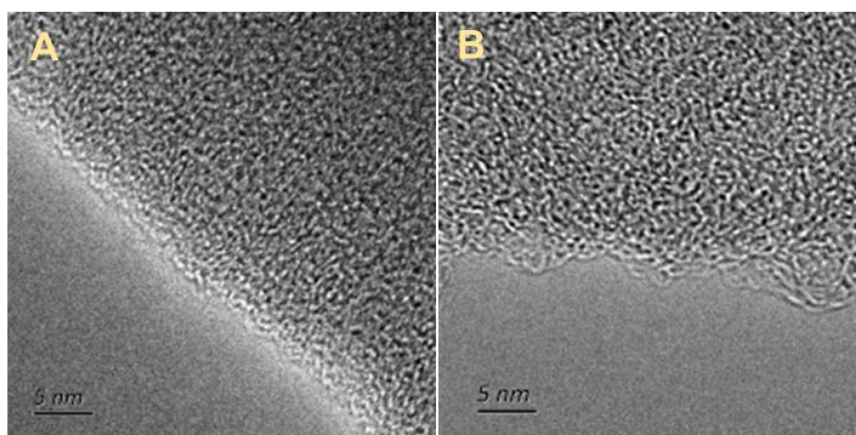

**Figure S1.** TEM images of the samples (A) NPC-1-600r and (B) NPC-1-600.

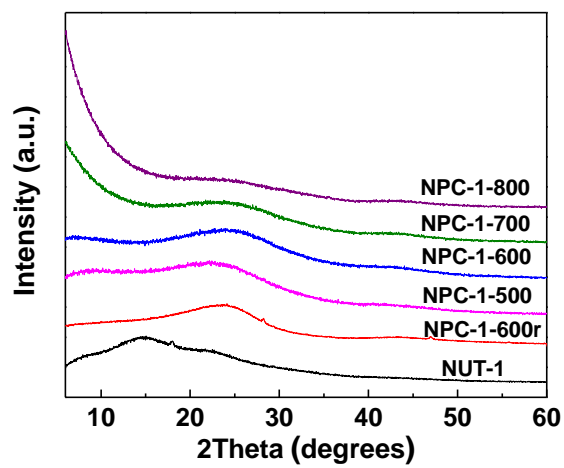

**Figure S2.** XRD patterns of the polymer NUT-1 and the NPCs.

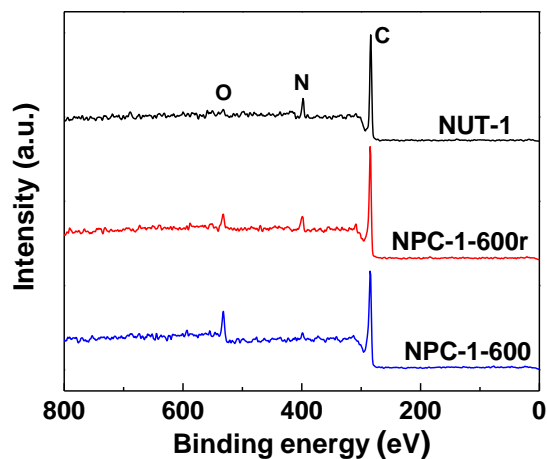

**Figure S3.** XPS wide spectra of the polymer NUT-1, NPC-1-600r, and NPC-1-600.

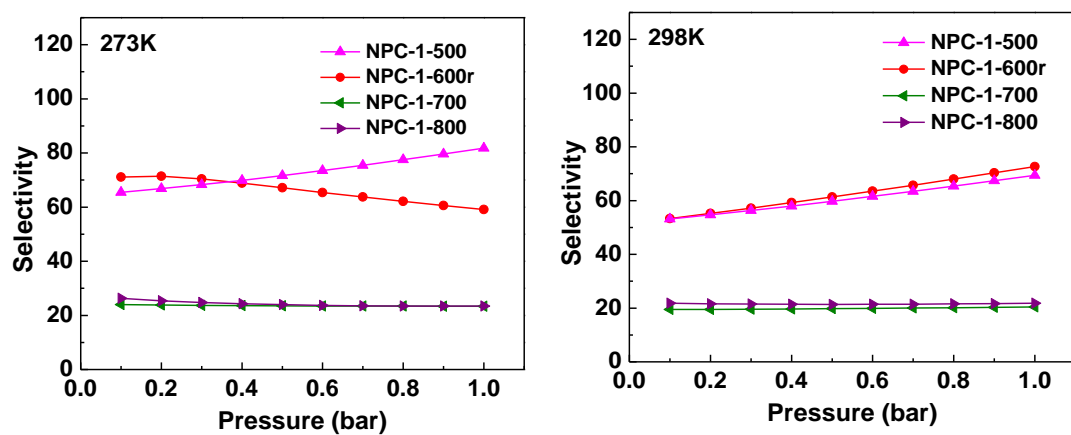

**Figure S4.** IAST selectivity of  $\text{CO}_2/\text{N}_2$  on the NPCs at 273 and 298 K. The ratio of  $\text{CO}_2/\text{N}_2$  used for simulation is 15/85.

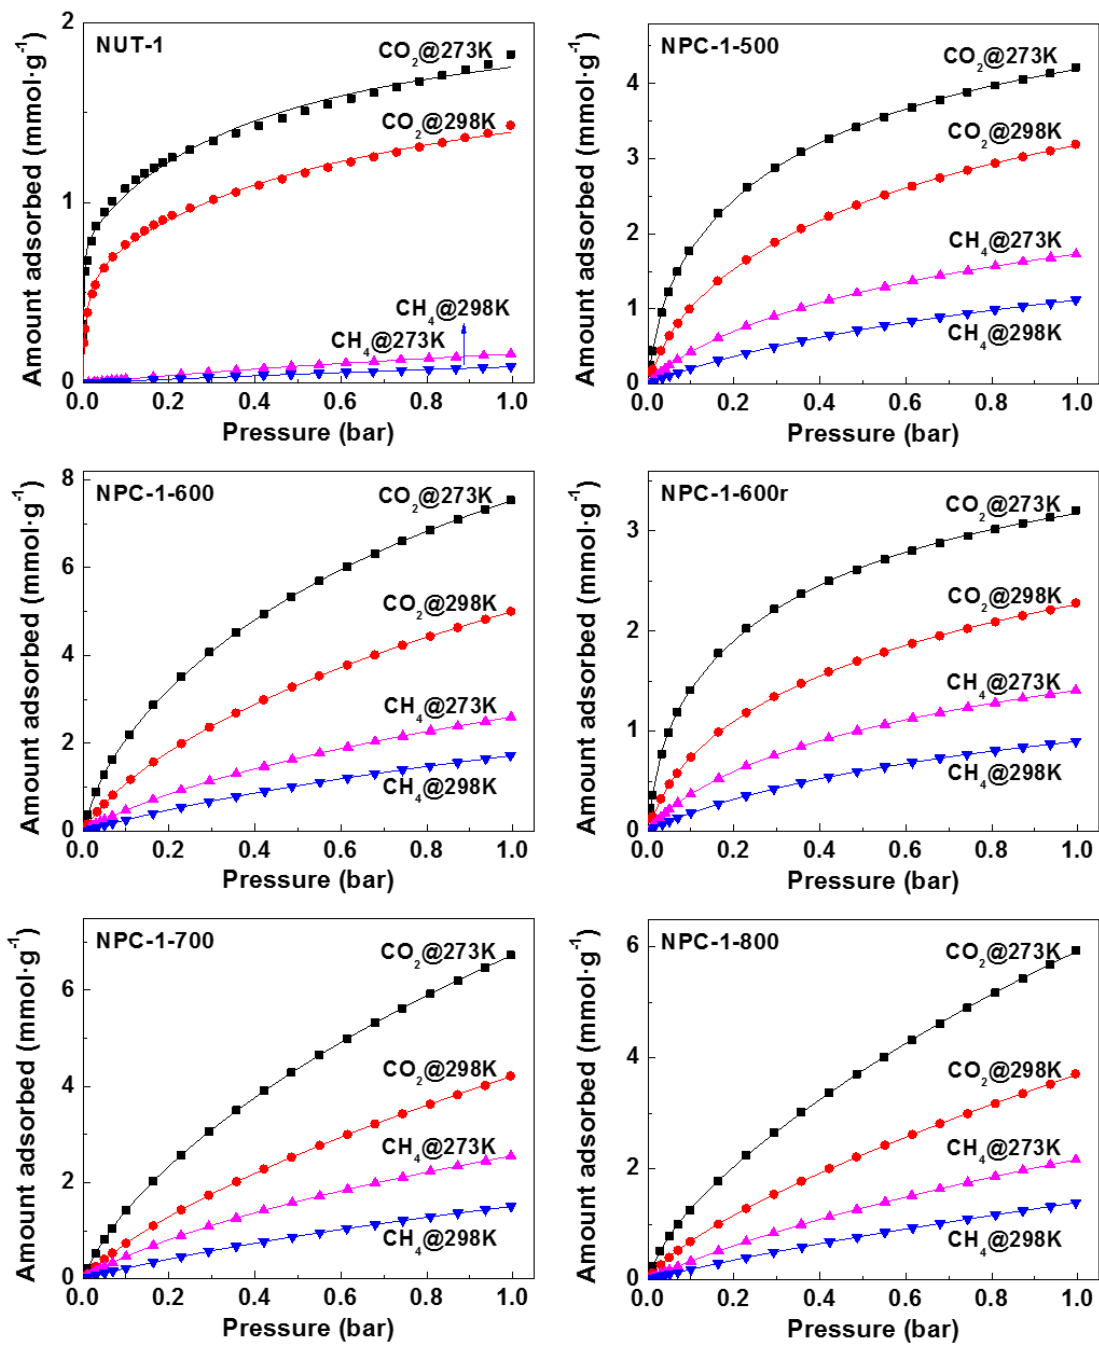

**Figure S5.** Adsorption isotherms of CO<sub>2</sub> and CH<sub>4</sub> over the polymer NUT-1 and the NPCs at two different temperatures 273 and 298 K.

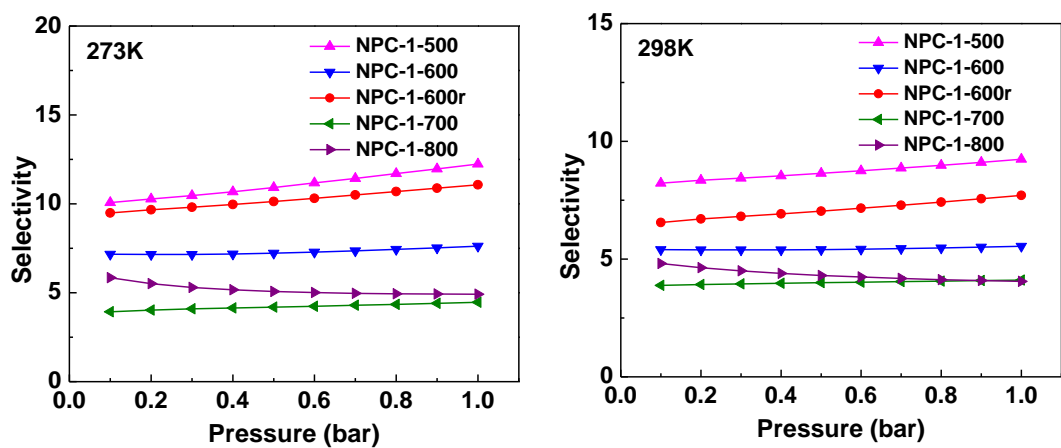

**Figure S6.** IAST selectivity of CO<sub>2</sub>/CH<sub>4</sub> on the NPCs at 273 and 298 K. The ratio of CO<sub>2</sub>/CH<sub>4</sub> used for simulation is 50/50.
